# Supplementary material
Source: PubMed Central journal article supplement (PMC8493519)
Supplement: NIHMS1721742-supplement-2.pdf [file NIHMS1721742-supplement-2.pdf]

# Supplementary Figure S1

Contrast enhancement (% Enhancement) at CM phase compared to RNA expression of all genes. Waterfall plot of correlation coefficient values for all genes.

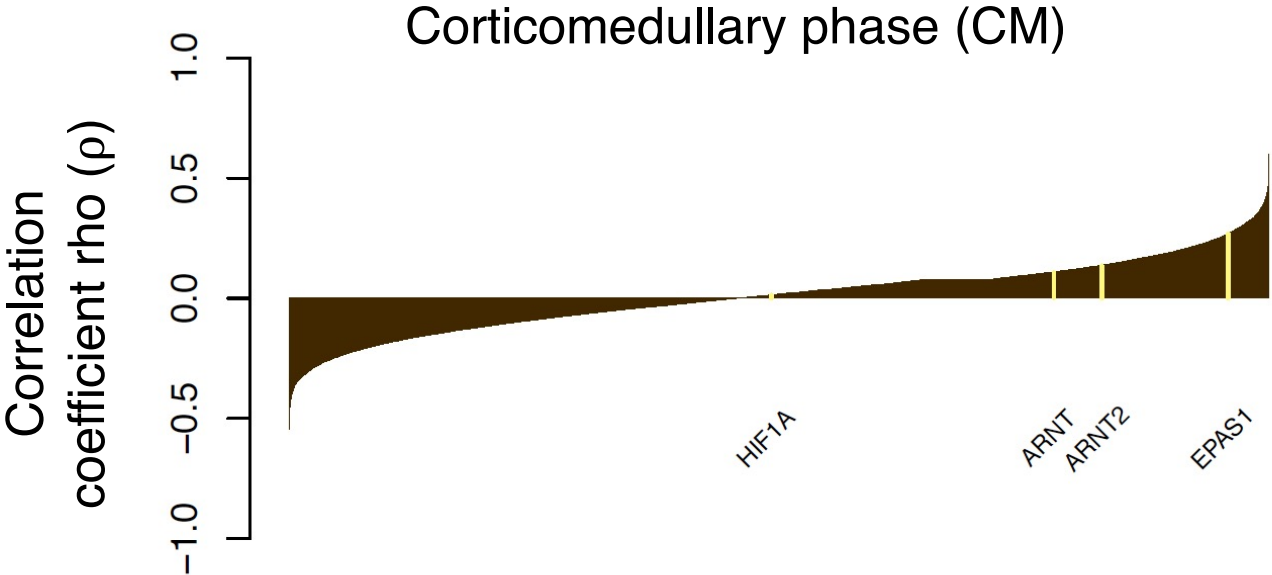

# Supplementary Figure S2

## Gene expression based survival analysis of TCGA-KIRC cohort

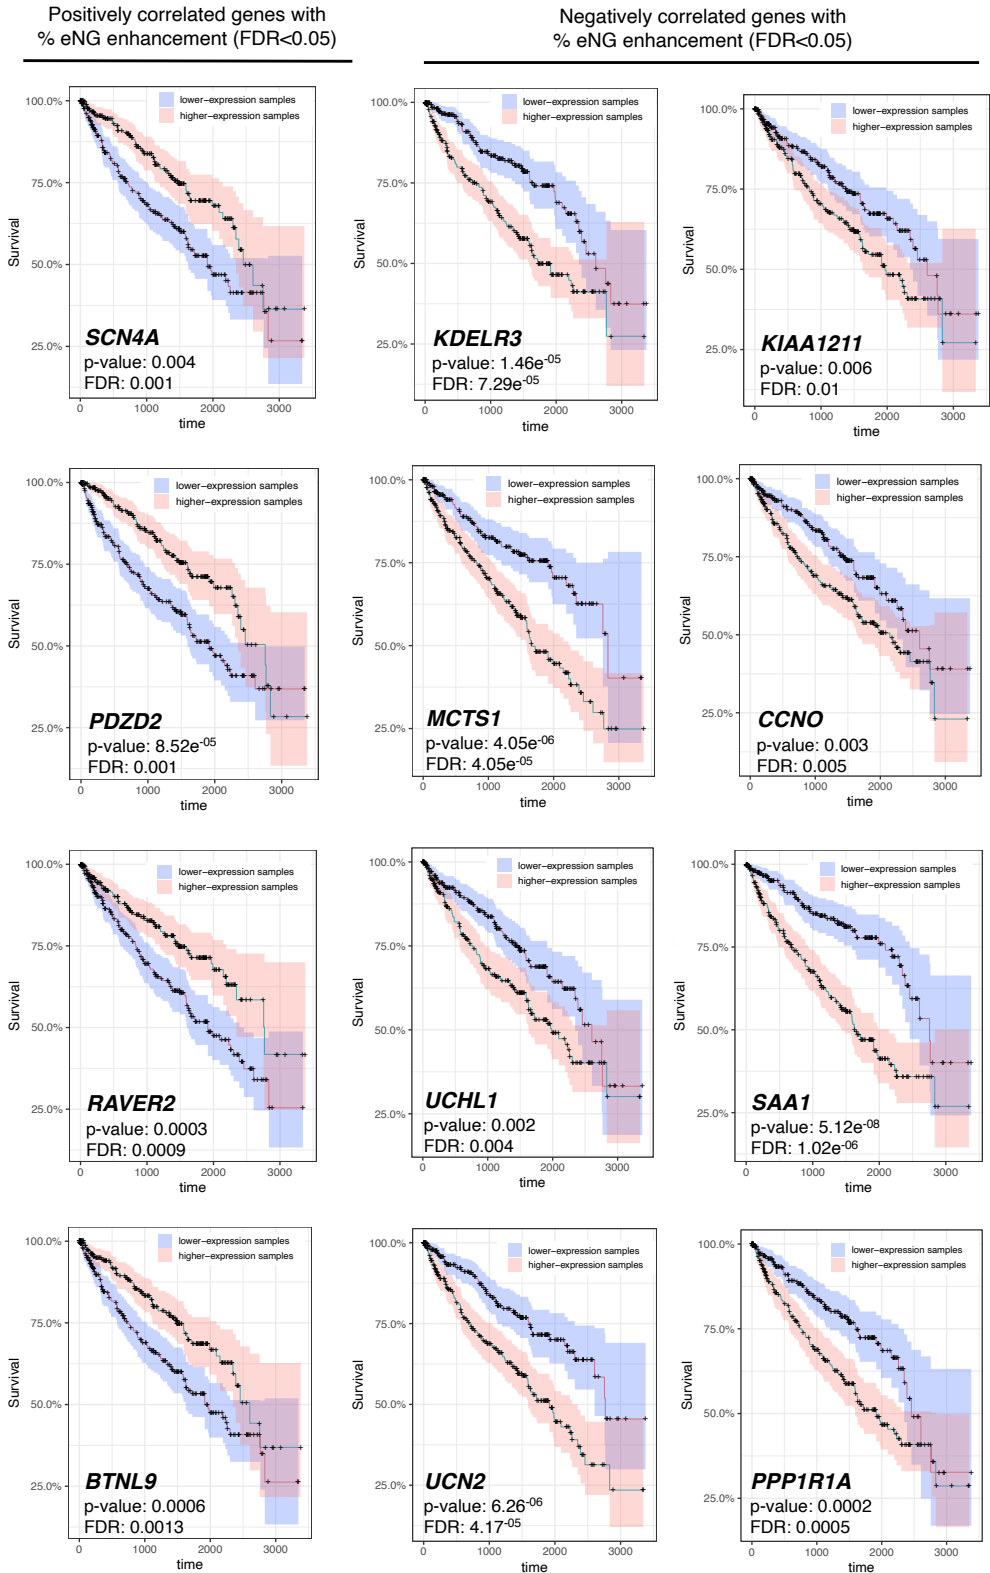

**Gene expression based survival analysis of TCGA-KIRC cohort.** The plots represent survival analysis for TCGA-KIRC patient cohort as a function of gene expression levels. X-axis indicates time of survival in days. Y-axis indicates percentage of survival. Left column represents survival plots for genes positively correlated with enhancement (*SCN4A*, *PDZD2*, *RAVER2*, and *BTNL9*). The middle and right columns represent survival plots for genes negatively correlated with enhancement (*KDELR3*, *MCTS1*, *UCHL1*, *UCN2*, *KIAA1211*, *CCNO*, *SAA1*, and *PP1R1A*). The red curve indicates ccRCC tumor group with high RNA expression of the genes and the blue curve indicates ccRCC tumor group with low RNA expression of the genes. P-values and FDR are shown in the inserts of each graph.

# Supplementary Figure S3

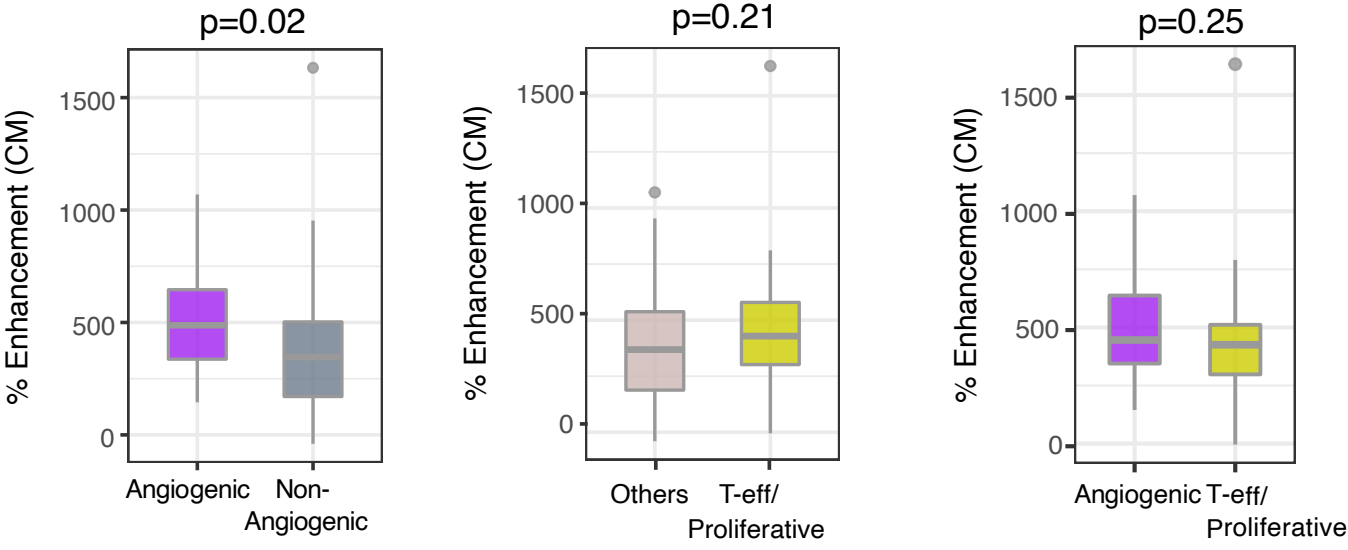

Box plot comparing % enhancement in the CM phase of the dynamic contrast enhanced MRI between angiogenic and non angiogenic sample groups (Left), between Teffector/Proliferative and other genes sample groups (Middle), and between exclusively angiogenic and Teffector/Proliferative sample groups (Right). All P-values are indicated in the plots.

## Supplementary Figure S4

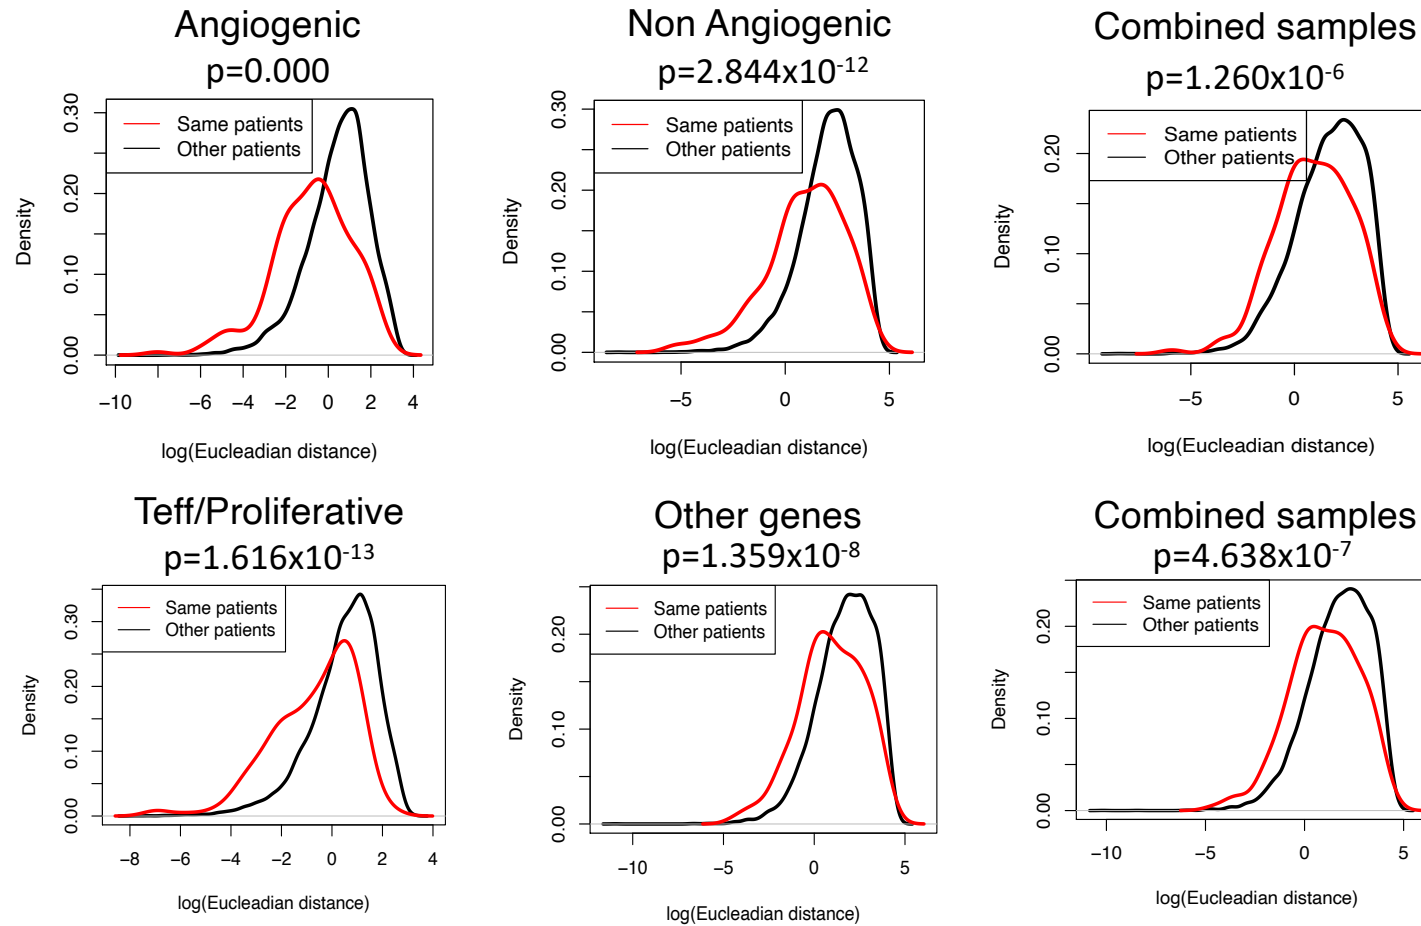

Euclidean distance plots for the angiogenic, non angiogenic, and combined sample groups (**Top panels**). Euclidean distance plots for Teffector/Proliferative, Other genes, and combined sample groups (**Bottom panels**). Black and red curves represent variability in gene expression between different patient tumors and variability within the same tumor respectively.

## Supplementary Figure S5

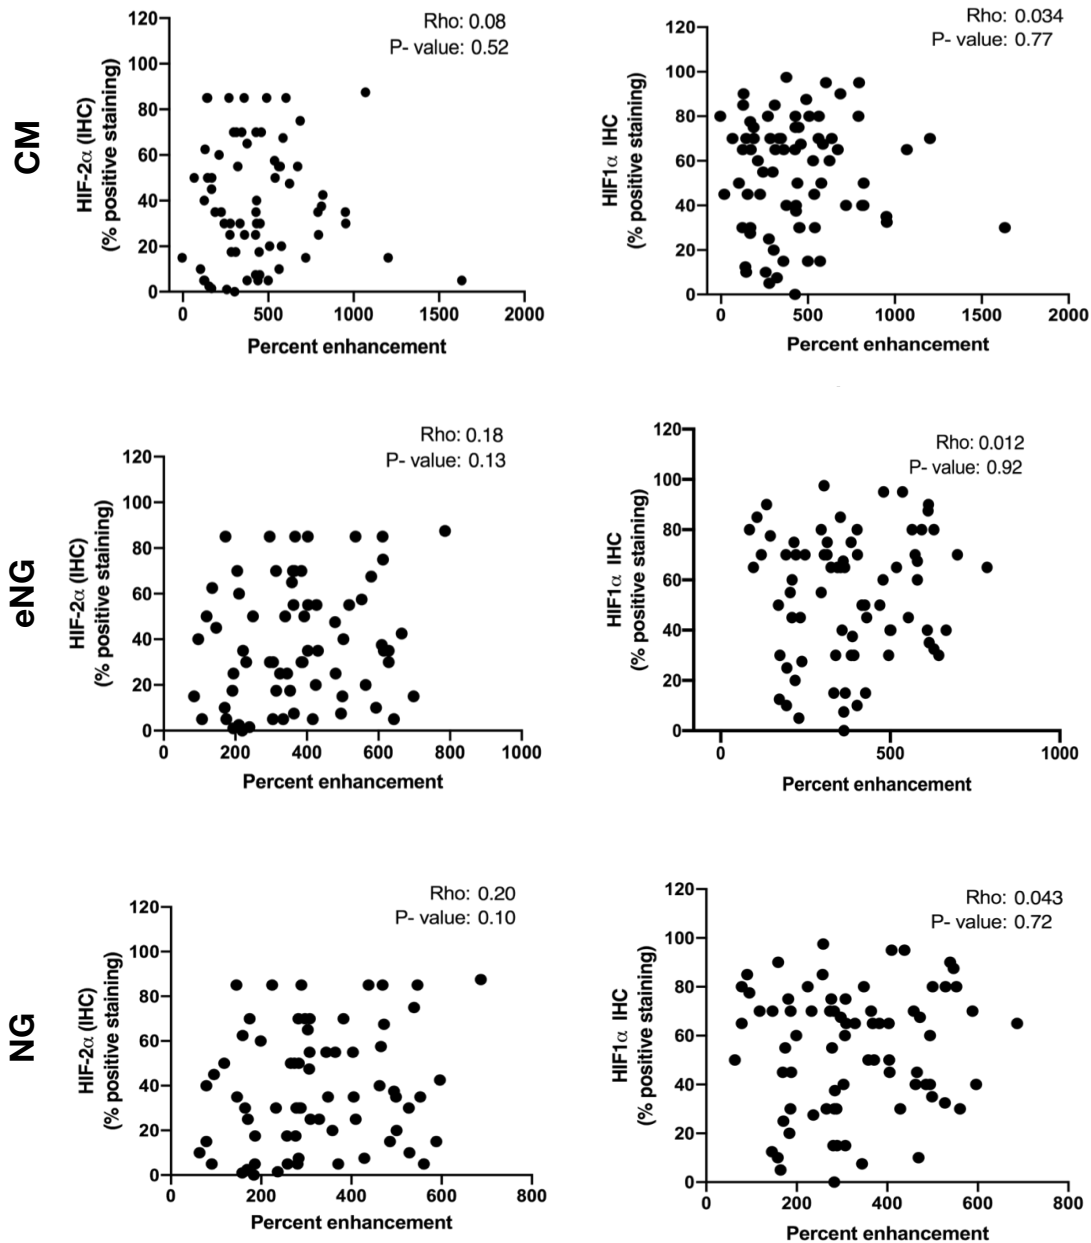

**Correlation analysis of protein expression levels of HIF-1 $\alpha$  and HIF-2 $\alpha$  with DCE post-contrast phases.** Left column shows the Spearman ranked correlation between HIF-2 $\alpha$  protein expression levels, measured as percentage positive staining on immunohistochemistry (Y-axis), and the percentage enhancement on DCE phases (X-axis). CM phase (top row), eNG phase (middle row), and NG phase (bottom row). The right column shows similar Spearman ranked correlation between HIF-1 $\alpha$  protein expression levels and DCE percentage enhancement on DCE phases. The correlation coefficient (rho) and P-values are shown in each graph.
